# Supplementary material for: HP1α targets the chromosomal passenger complex for activation at heterochromatin before mitotic entry
Source: PubMed Central journal article supplement (PMC5852645; doi:10.15252/embj.201797677), 2018-02-21
Supplement: EMBJ-37-e97677-s001.pdf [file EMBJ-37-e97677-s001.pdf]

## Expanded View Figures

**Figure EV1. Localisation properties of the various tethering constructs.**

- A, B HeLa cells expressing the indicated HP1 $\alpha$  fusion constructs, stained with Hoechst 33342 and immunostained for CENP-C after pre-extraction. Line scan showing the expressed HP1 $\alpha$  construct and CENP-C (i); the expressed HP1 $\alpha$  construct only (ii); CENP-C only (iii). Scale bars, 5  $\mu$ m.
- C Alignment of the CENP-B DNA-binding domain protein sequences from various species. Multiple sequence alignment was performed using Clustal Omega and edited with Aline for display. The following species were used for the alignment: *Homo sapiens*, *Mus musculus*, *Cricetulus griseus*, *Rattus norvegicus*, *Schizosaccharomyces pombe* (CENP-B homolog proteins 1 and 2), *Ornithorhynchus anatinus*, *Bos taurus*, *Cavia porcellus*, *Macaca mulatta* and *Pediculus humanus*.
- D Structure of the CENP-B DNA-binding domain is shown as a ribbon diagram interacting with DNA (PDB code 1HLV). Mutated residues are shown in stick.
- E HeLa cells expressing the indicated HP1 $\alpha$  fusion constructs, stained with Hoechst 33342 and immunostained for CENP-C. Scale bar, 5  $\mu$ m.
- F Immunoblot of HeLa cell lysates transfected with the indicated HP1 $\alpha$  fusion constructs. HP1 $\alpha$  fusion constructs were detected with anti-GFP antibody and  $\alpha$ -tubulin was used as a loading control.

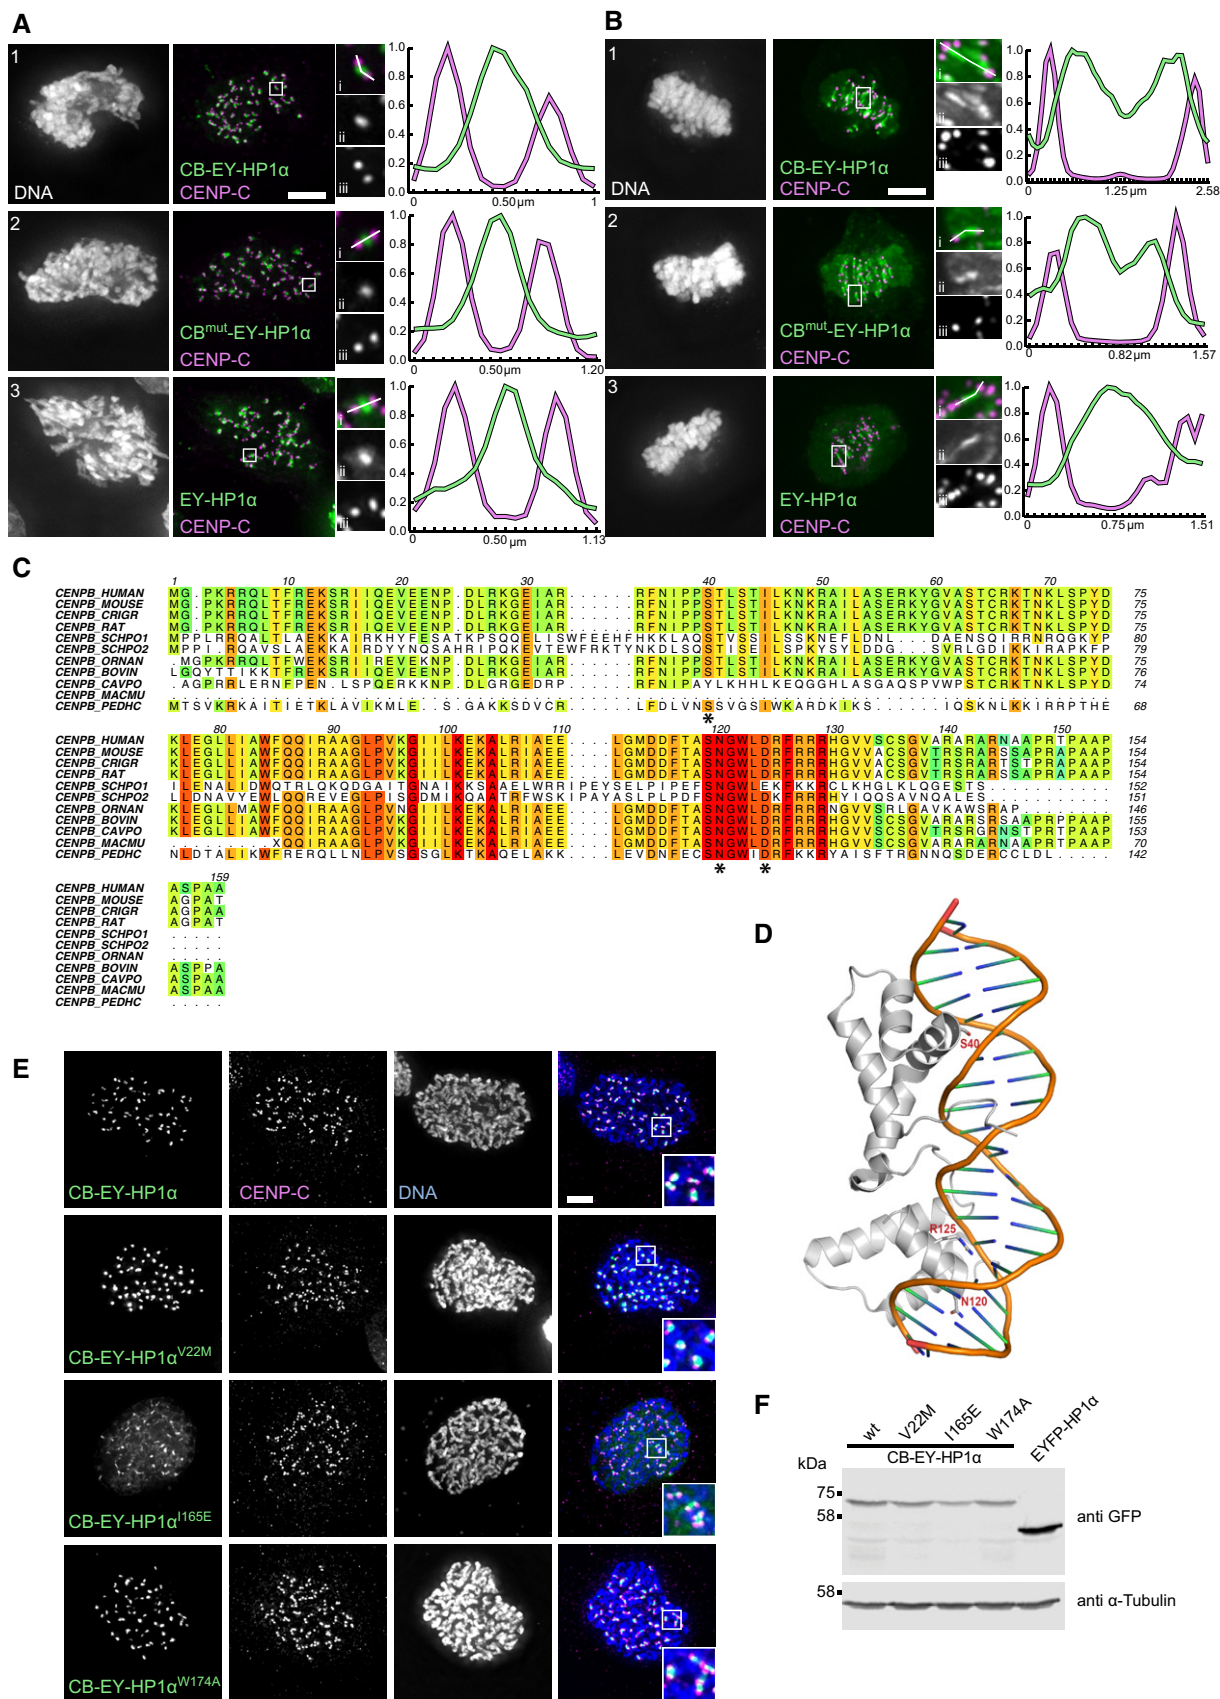

Figure EV1.

**Figure EV2. Constitutive retention of HP1-bound CPC results in H3S10 phosphorylation in interphase that is sensitive to low concentrations of ZM447439.**

- A, B HeLa cells expressing the wild-type HP1 $\alpha$  (1) or mutated HP1 $\alpha$ <sup>W174A</sup> (2) tethering construct at the indicated stages, stained with Hoechst 33342 and immunostained for Aurora B and  $\alpha$ -tubulin. The image brightness of the EYFP channel was scaled individually to optimise the clarity of the protein localisation, but in both examples, the CB-EY-HP1 $\alpha$ <sup>W174A</sup> was expressed at higher levels. Scale bars, 5  $\mu$ m.
- C, D HeLa cells expressing the wild-type HP1 $\alpha$  tethering construct treated with either DMSO (1) or with 0.5  $\mu$ M ZM447439 (2) for 60 min before fixation, stained with Hoechst 33342 and immunostained for H3S10ph and  $\alpha$ -tubulin (C) or Aurora B and H3S10ph (D). Scale bars, 10  $\mu$ m.

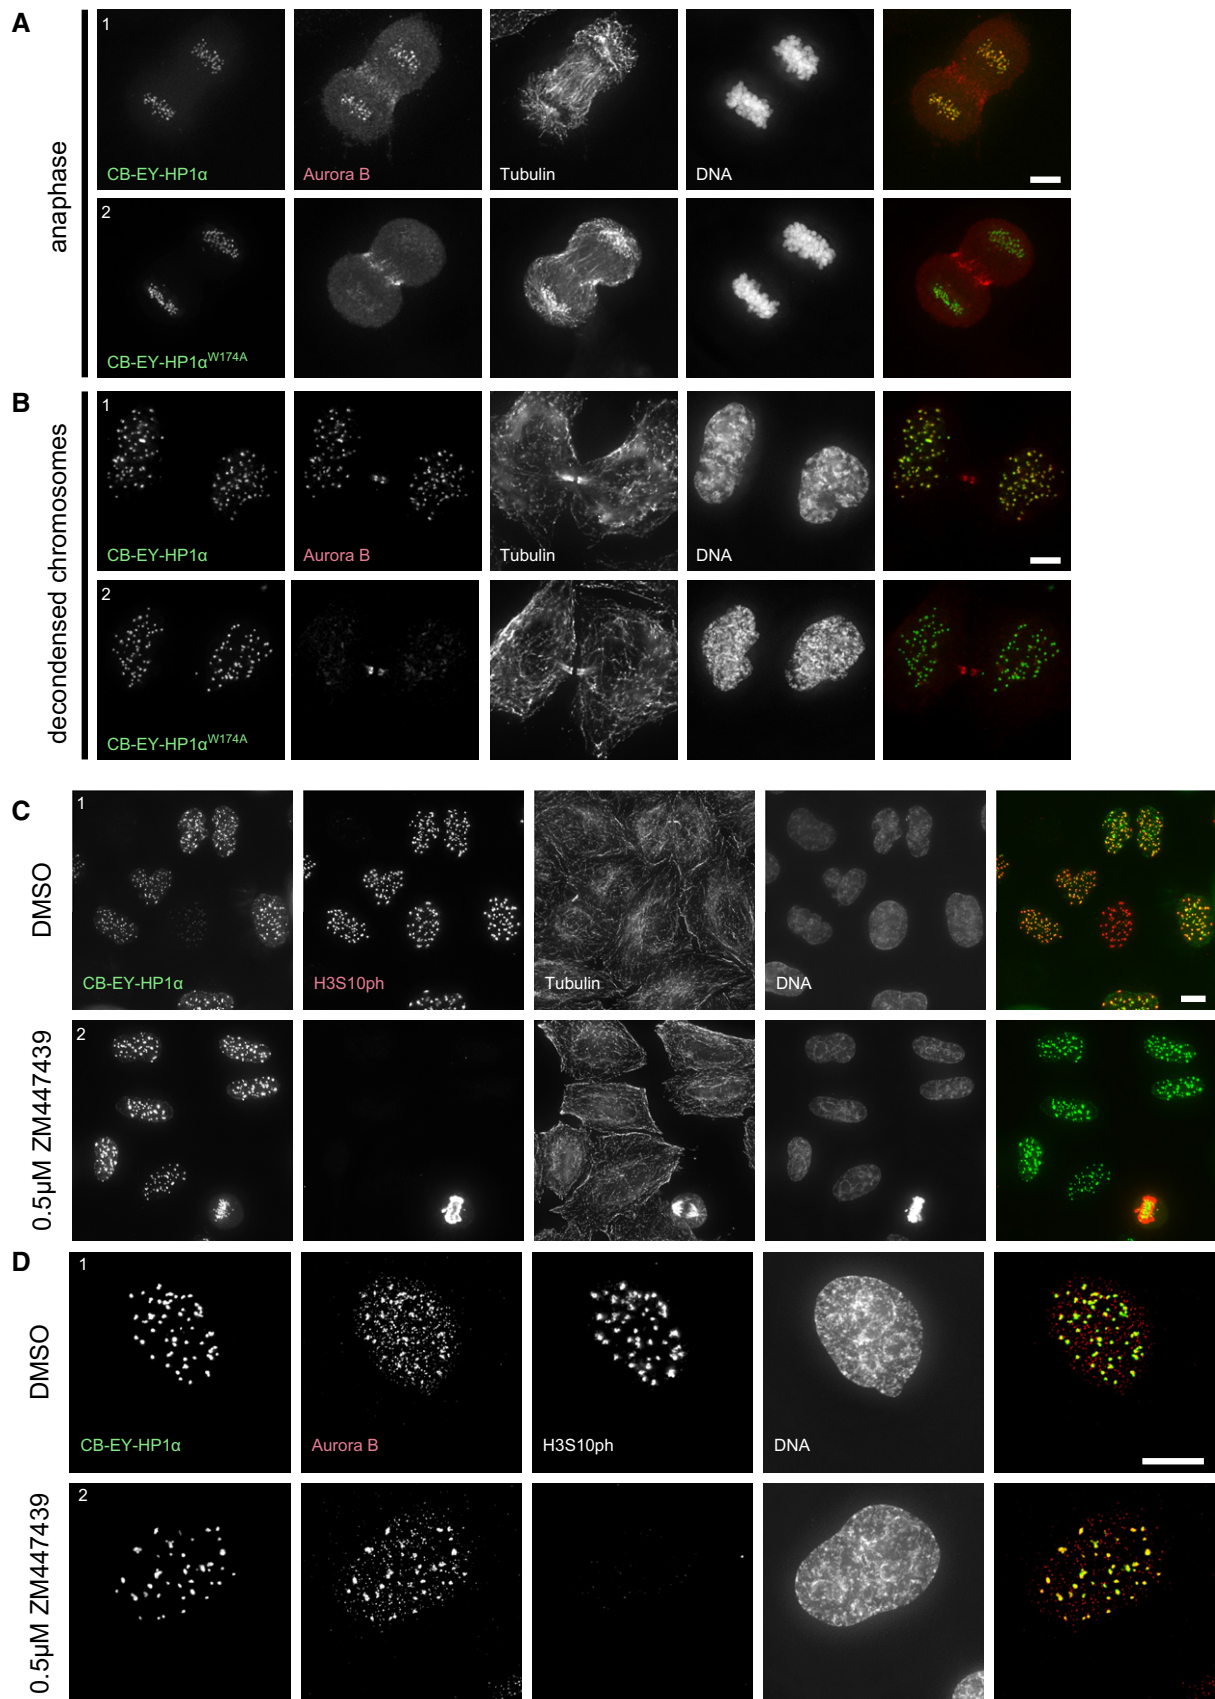

Figure EV2.



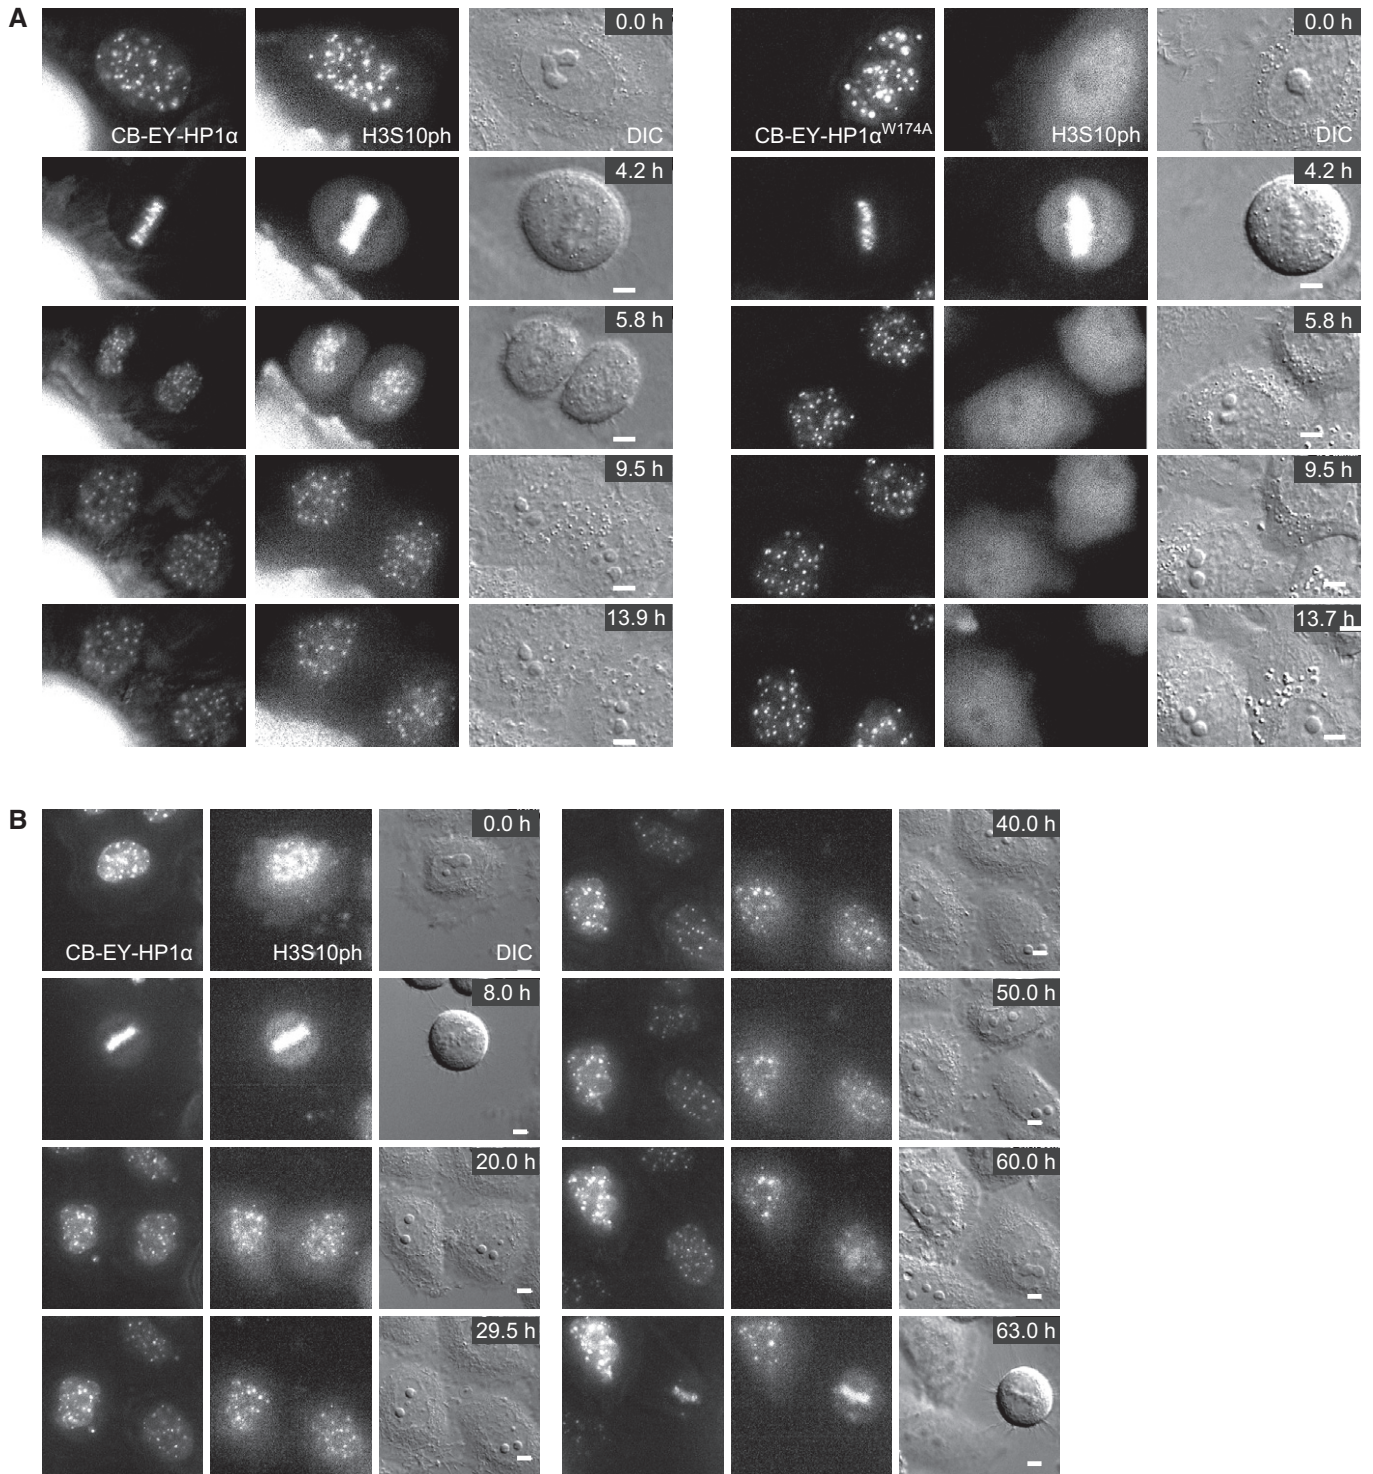

**Figure EV3. Live cell imaging demonstrates that the H3S10ph signal in CB-EY-HP1 $\alpha$  expressing cells persists throughout interphase.**

A, B Stills of live cell imaging movies using CF640R-labelled Fabs against H3S10ph in HeLa cells expressing the indicated construct. Images were acquired with a 100 $\times$  objective every 10 min (A) or with a 60 $\times$  objective every 30 min (B) with five z sections every 2  $\mu$ m. Scale bars, 5  $\mu$ m.

**Figure EV4. Live cell imaging demonstrates the robustness of the H3S10ph foci in synchronised G<sub>2</sub> cells that are sensitive to low concentrations of ZM447439.**

- A HeLa CDK1-as cells were transfected with EY-HP1 and treated 24 h after transfection with either 10  $\mu$ M 1NM-PP1 (+1NM-PP1) or DMSO (-1NM-PP1) for 20 h. Cells were treated with 0.5  $\mu$ M ZM447439 for 60 min before fixation, stained with Hoechst 33342 and immunostained for Aurora B and H3S10ph. Scale bar, 5  $\mu$ m.
- B Stills of a live cell imaging movie using Cy5-labelled Fabs against H3S10ph in HeLa CDK1-as cells treated with 10  $\mu$ M 1NM-PP1. Images were acquired every 6 min with five z sections every 1  $\mu$ m. Scale bars, 5  $\mu$ m.

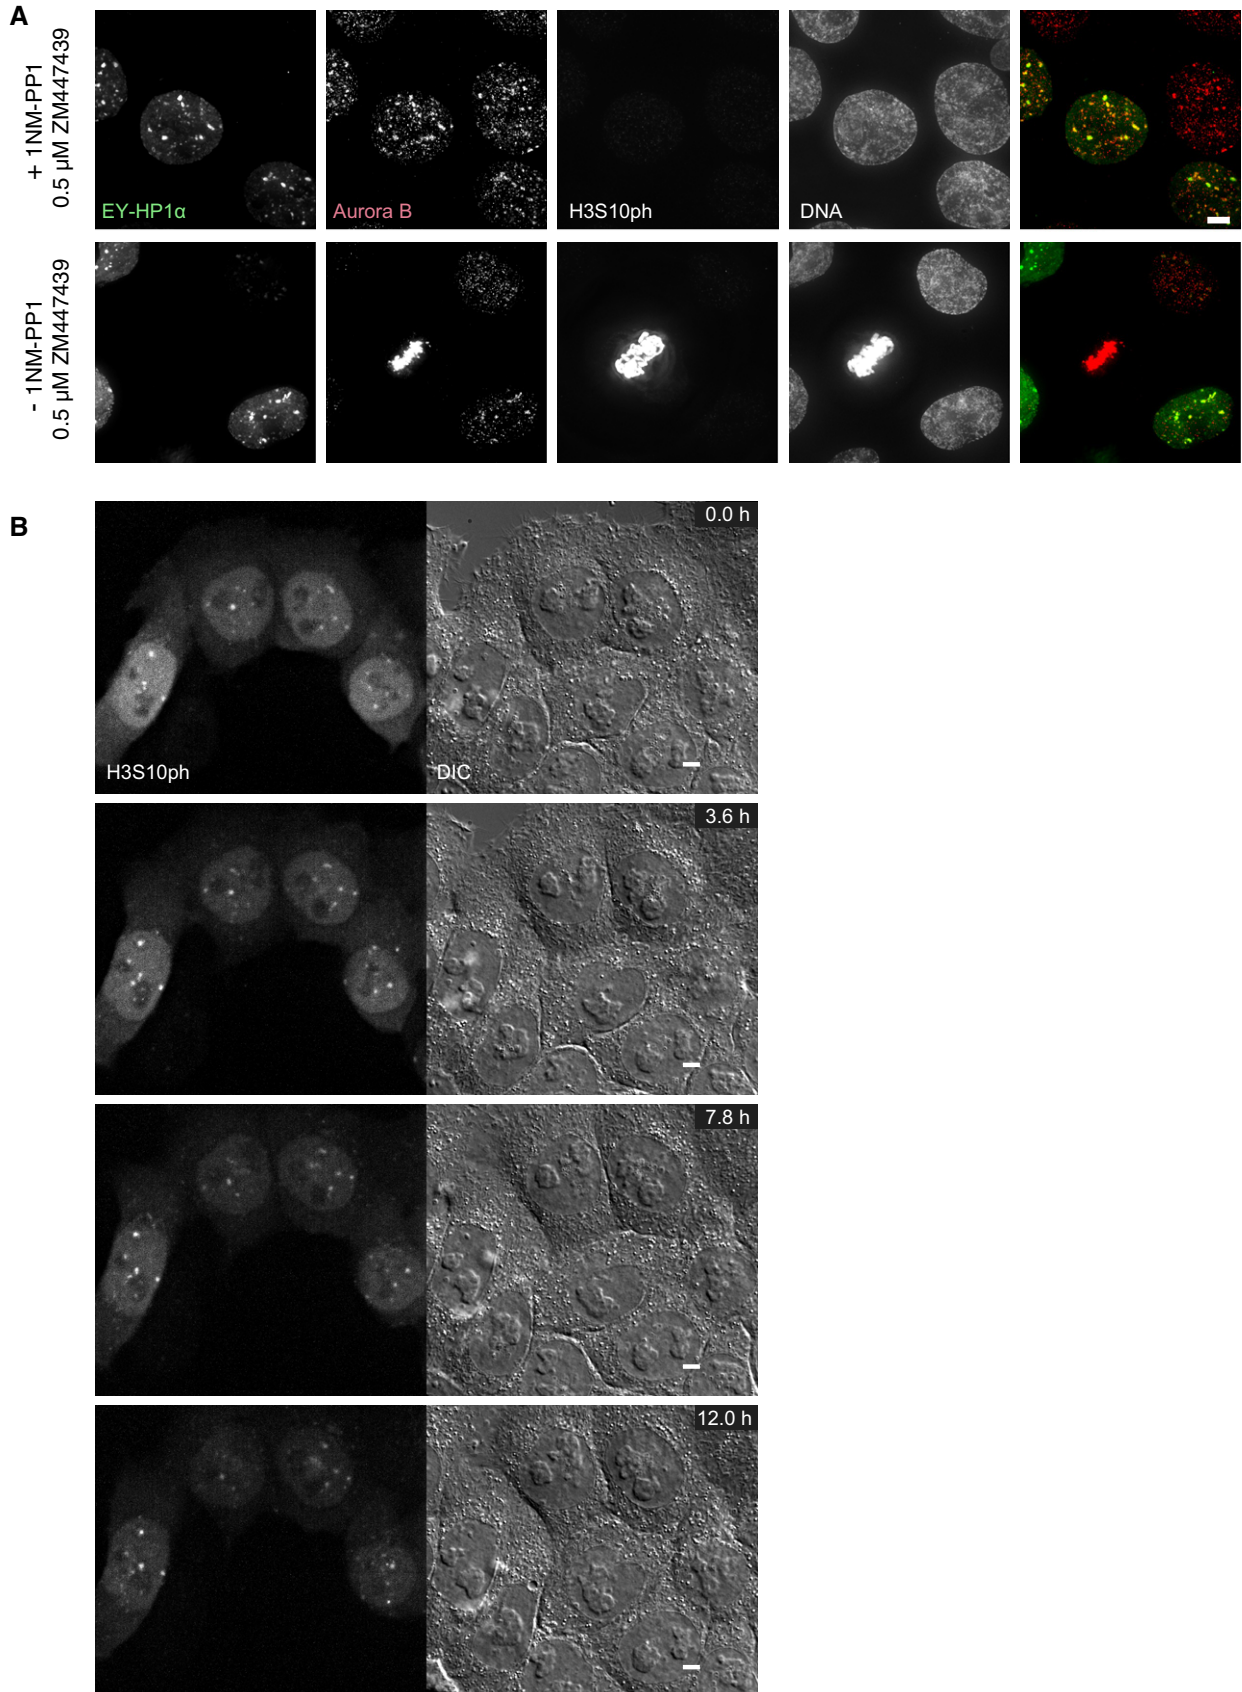

Figure EV4.

**Figure EV5. Time difference between the robust appearance of H3S10ph and H3T3ph seems to be smaller in HP1 $\alpha$  + HP1 $\gamma$  double KO cells.**

- A Immunoblot of the indicated HP1 KO cell lines using anti-HP1 $\alpha$ , HP1 $\beta$  or HP1 $\gamma$  antibodies and GAPDH was used as a loading control.
- B Stills of live cell imaging movies using Cy5-labelled Fabs against H3S10ph in HeLa wild-type or HP1 $\alpha$  and HP1 $\gamma$  double KO cells. Brightness of the far red channel was adjusted individually (0.65% difference), to account for slightly higher amount of loaded Fab fragments in the wild-type cell. Images were acquired every 6 min with five z sections every 1.2  $\mu$ m. Scale bars, 5  $\mu$ m.
- C HeLa wild-type (1), or HP1 $\alpha$  and HP1 $\gamma$  double KO (2) cells were stained with Hoechst 33342 and immunostained for H3S10ph and H3T3ph. Scale bar, 5  $\mu$ m.
- D Stills of live cell imaging movies using Alexa488-labelled Fabs against H3S10ph and CF640R-labelled Fabs against H3T3ph in HeLa wild-type or HP1 $\alpha$  and HP1 $\gamma$  double KO cells. Brightness of the far red channel was adjusted individually (0.76% difference), to account for slightly higher amount of loaded Fab fragments in the HP1 $\alpha$  and HP1 $\gamma$  double KO cell. Images were acquired every 10 min with five z sections every 1.2  $\mu$ m. Scale bars, 5  $\mu$ m.



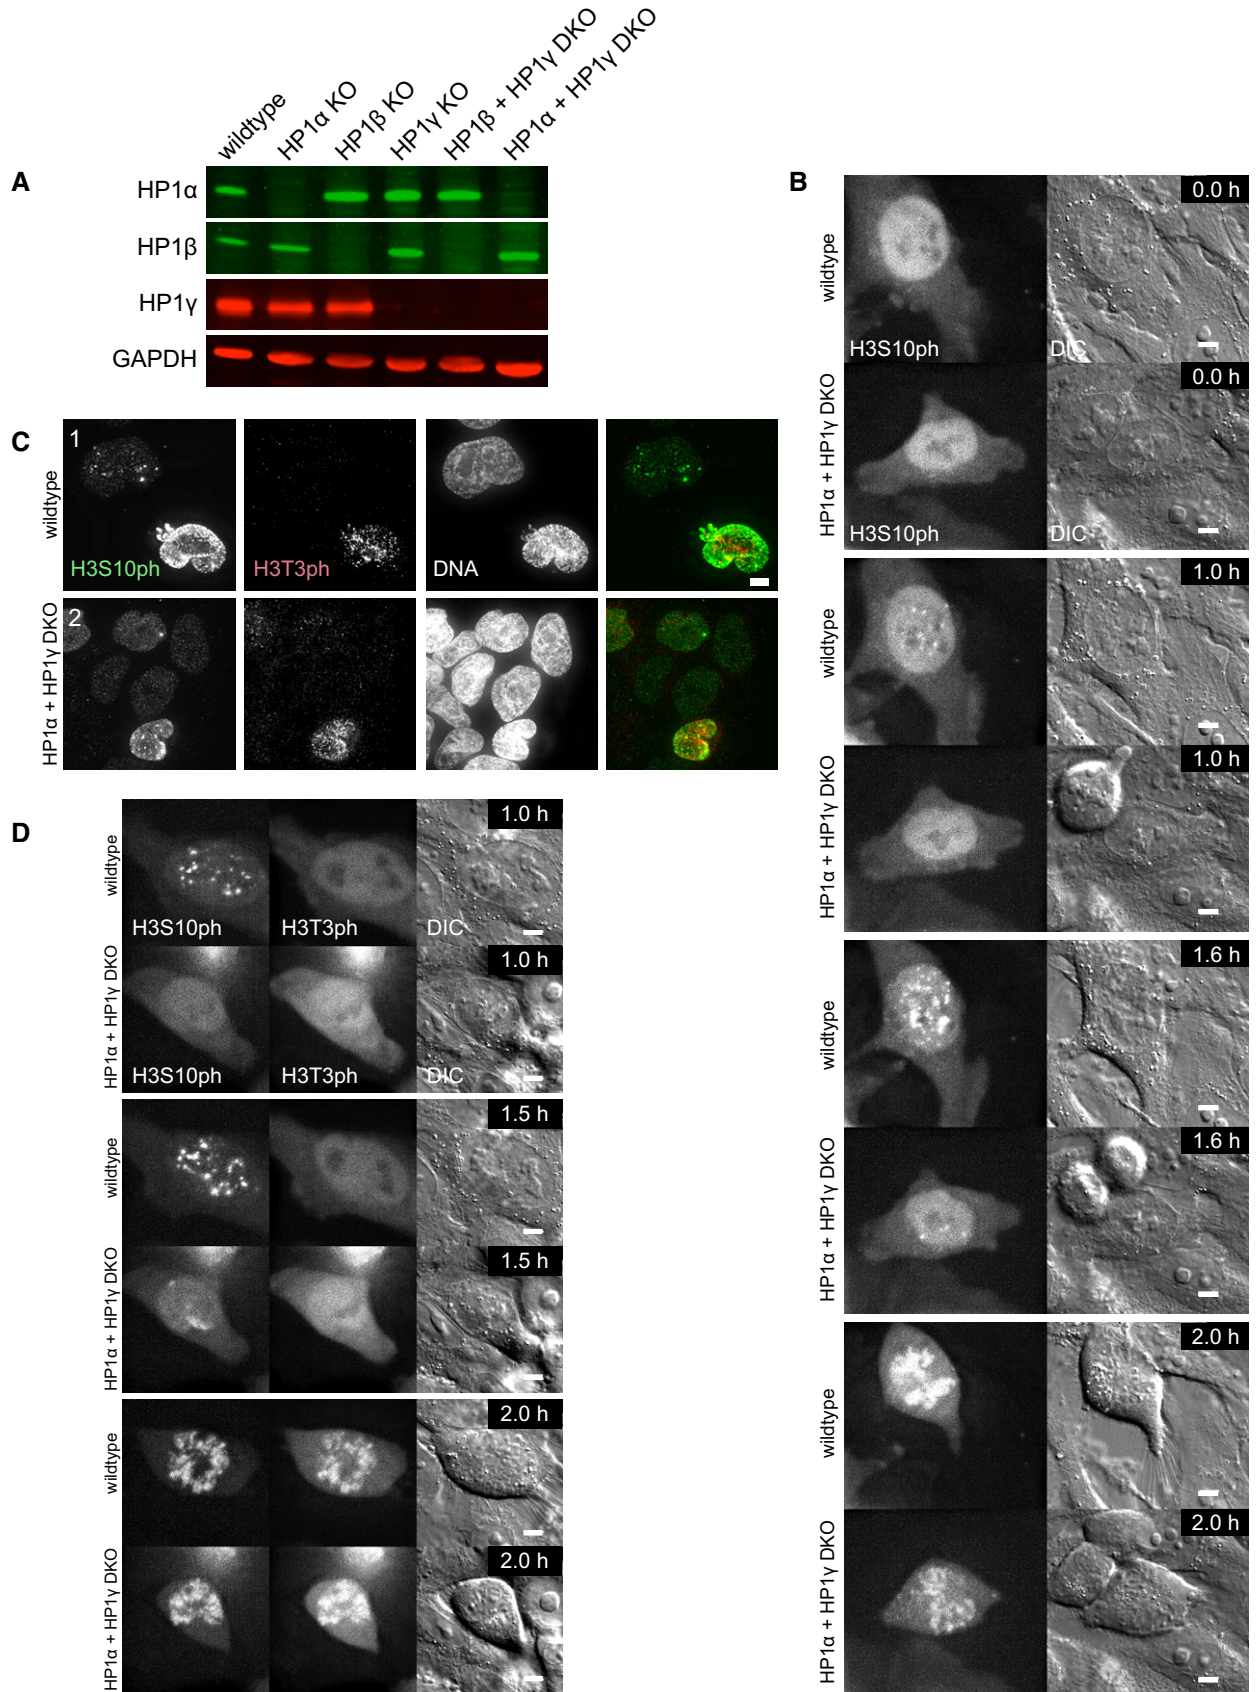

Figure EV5.
